# Supplementary material for: Deriving Automated Device Metadata From Intracranial Pressure Waveforms: A Transforming Research and Clinical Knowledge in Traumatic Brain Injury ICU Physiology Cohort Analysis
Source: PubMed Central journal article supplement — Crit Care Explor. 2024 Jul 16;6(7):e1118. doi: 10.1097/CCE.0000000000001118 (PMC11254120; doi:10.1097/cce.0000000000001118), 2024-07-16
Supplement: cc9-6-e1118-s001.pdf [file cc9-6-e1118-s001.pdf]

# Deriving Automated Device Metadata from Intracranial Pressure Waveforms: A TRACK-TBI ICU Physiology Cohort Analysis

## Supplementary Materials

### Table of Contents

|                                                  |    |
|--------------------------------------------------|----|
| Methods.....                                     | 3  |
| Population and inclusion criteria .....          | 3  |
| Table S1 .....                                   | 3  |
| Feature selection and classification .....       | 5  |
| Figure S1.....                                   | 5  |
| Subgroup analysis.....                           | 6  |
| Table S2.....                                    | 6  |
| Figure S2.....                                   | 7  |
| Management of artifacts .....                    | 8  |
| Results.....                                     | 9  |
| Conventional cross-validation .....              | 9  |
| Table S3.....                                    | 9  |
| Table S4.....                                    | 9  |
| Table S5.....                                    | 9  |
| Misclassification samples .....                  | 10 |
| Figure S3.....                                   | 10 |
| Subgroup analysis (cluster analysis).....        | 10 |
| Table S6.....                                    | 10 |
| Table S7.....                                    | 10 |
| Subgroup Analysis by Propensity Score.....       | 11 |
| Table S8.....                                    | 11 |
| Table S9.....                                    | 11 |
| Subgroup Analysis by Potential Confounders ..... | 12 |
| Table S10.....                                   | 12 |
| Table S11.....                                   | 12 |
| Feature selection .....                          | 13 |

|                          |    |
|--------------------------|----|
| Figure S4.....           | 13 |
| Held-out evaluation..... | 14 |
| IRB site info.....       | 15 |

## Methods

### Population and inclusion criteria

**Table S1:** Baseline characteristics

|                                         | <b>EVD monitor</b> | <b>IPM monitor</b> | <b>Both monitors</b> | <b>P-value<br/>(EVD vs. IPM)</b> |
|-----------------------------------------|--------------------|--------------------|----------------------|----------------------------------|
| <b>Patients, n</b>                      | 47                 | 26                 | 9                    |                                  |
| <b>ICP hours total, mean (SD)</b>       | 10,423.2 (57.2)    | 2,740.3 (15.0)     | 5,046.0 (27.7)       | <b>&lt;0.001</b>                 |
| <b>ICP hours per patient, mean (SD)</b> | 7.80 (23.02)       | 4.61 (0.87)        | 5.02 (0.58)          | 0.478                            |
| <b>Age, mean (SD)</b>                   | 45.34 (16.80)      | 46.69 (17.78)      | 50.22 (13.35)        | 0.748                            |
| <b>Female sex, n (%)</b>                | 8 (17.0)           | 7 (26.9)           | 0 (0.0)              | 0.484                            |
| <b>BMI, n (%)</b>                       |                    |                    |                      | 0.415                            |
| Normal (18.5-24.9)                      | 8 (21.1)           | 8 (33.3)           | 2 (22.2)             |                                  |
| Underweight (<18.5)                     | 1 (2.6)            | 0 (0.0)            | 0 (0.0)              |                                  |
| Overweight (24.9-29.9)                  | 21 (55.3)          | 9 (37.5)           | 6 (66.7)             |                                  |
| Obese (>29.9)                           | 8 (21.1)           | 7 (29.2)           | 1 (11.1)             |                                  |
| <b>Race, n (%)</b>                      |                    |                    |                      | 0.610                            |
| White                                   | 39 (84.8)          | 24 (92.3)          | 5 (55.6)             |                                  |
| Black                                   | 4 (8.7)            | 2 (7.7)            | 3 (33.3)             |                                  |
| Asian                                   | 2 (4.3)            | 0 (0.0)            | 0 (0.0)              |                                  |
| Native Hawaiian/Pacific Islander        | 0 (0.0)            | 0 (0.0)            | 1 (11.1)             |                                  |
| Mixed Race                              | 1 (2.2)            | 0 (0.0)            | 0 (0.0)              |                                  |
| <b>Ethnicity, n (%)</b>                 |                    |                    |                      | 0.480                            |
| Hispanic                                | 14 (29.8)          | 5 (19.2)           | 0 (0.0)              |                                  |
| Non-Hispanic                            | 33 (70.2)          | 21 (80.8)          | 8 (100.0)            |                                  |
| <b>Institution, n (%)</b>               |                    |                    |                      | <b>&lt;0.001</b>                 |
| Hospital A                              | 14 (29.8)          | 0 (0.0)            | 0 (0.0)              |                                  |
| Hospital B                              | 1 (2.1)            | 0 (0.0)            | 0 (0.0)              |                                  |
| Hospital C                              | 22 (46.8)          | 5 (19.2)           | 7 (77.8)             |                                  |
| Hospital D                              | 0 (0.0)            | 13 (50.0)          | 2 (22.2)             |                                  |
| Hospital E                              | 10 (21.3)          | 8 (30.8)           | 0 (0.0)              |                                  |
| <b>ICP monitor source, n (%)</b>        |                    |                    |                      | <b>&lt;0.001</b>                 |
| Natus Camino                            | 0 (0.0)            | 8 (30.8)           | 0 (0.0)              |                                  |
| Philips Intellivue                      | 47 (100.0)         | 18 (69.2)          | 9 (100.0)            |                                  |
| <b>GCS score, median [IQR]</b>          |                    |                    |                      |                                  |
| Eye                                     | 1.00 [1.00, 3.00]  | 1.00 [1.00, 1.00]  | 1.00 [1.00, 3.00]    | 0.890                            |
| Verbal                                  | 1.00 [1.00, 2.00]  | 1.00 [1.00, 2.00]  | 2.00 [1.00, 2.25]    | 0.190                            |
| Motor                                   | 1.00 [1.00, 5.00]  | 1.00 [1.00, 4.75]  | 3.50 [2.50, 5.00]    | 0.780                            |

|                                               |                   |                   |                   |              |
|-----------------------------------------------|-------------------|-------------------|-------------------|--------------|
| Total                                         | 3.50 [3.00, 10.0] | 3.00 [3.00, 7.00] | 7.50 [5.25, 9.25] | 0.539        |
| <b>Left pupil reactivity, n (%)</b>           |                   |                   |                   | 0.074        |
| Brisk                                         | 23 (53.5)         | 6 (25.0)          | 5 (83.3)          |              |
| Sluggish                                      | 9 (20.9)          | 9 (37.5)          | 1 (16.7)          |              |
| Non-reactive                                  | 11 (25.6)         | 9 (37.5)          | 0 (0.0)           |              |
| <b>Right pupil reactivity, n (%)</b>          |                   |                   |                   | <b>0.022</b> |
| Brisk                                         | 24 (57.1)         | 5 (21.7)          | 5 (14.4)          |              |
| Sluggish                                      | 8 (19.0)          | 9 (39.1)          | 1 (14.3)          |              |
| Non-reactive                                  | 10 (23.8)         | 9 (39.1)          | 1 (14.3)          |              |
| <b>Hypoxia upon ED arrival, n (%)</b>         | 3 (8.1)           | 5 (22.7)          | 1 (14.3)          | 0.233        |
| <b>Hypotension upon ED arrival, n (%)</b>     | 4 (11.4)          | 1 (4.3)           | 0 (0.0)           | 0.644        |
| <b>Decompressive hemicraniectomy, n (%)</b>   | <b>22 (46.8)</b>  | <b>10 (38.5)</b>  | <b>3 (33.3)</b>   | <b>0.658</b> |
| <b>Marshall CT score category, n (%)</b>      |                   |                   |                   | 0.939        |
| Category II                                   | 14 (31.8)         | 8 (32.0)          | 4 (44.4)          |              |
| Category III                                  | 3 (6.8)           | 3 (12.0)          | 1 (11.1)          |              |
| Category IV                                   | 2 (4.5)           | 1 (4.0)           | 0 (0.0)           |              |
| Category V                                    | 24 (54.5)         | 12 (48.0)         | 4 (44.4)          |              |
| Category VI                                   | 1 (2.3)           | 1 (4.0)           | 0 (0.0)           |              |
| <b>Subdural hemorrhage, n (%)</b>             | 35 (79.5)         | 22 (88.0)         | 7 (77.8)          | 0.575        |
| <b>Epidural hemorrhage, n (%)</b>             | 13 (29.5)         | 6 (24.0)          | 2 (22.2)          | 0.830        |
| <b>Subarachnoid hemorrhage, n (%)</b>         | 40 (90.9)         | 24 (96.0)         | 8 (88.9)          | 0.763        |
| <b>Presence of midline shift, n (%)</b>       | 22 (50.0)         | 14 (56.0)         | 0 (0.0)           | 0.819        |
| <b>Midline shift, mm (median [IQR])</b>       | 1.50 [0.00, 5.25] | 4.00 [0.00, 9.00] | 0.00 [0.00, 0.00] | 0.389        |
| <b>Acceleration-deceleration event, n (%)</b> | 20 (42.6)         | 9 (34.6)          | 5 (55.6)          | 0.679        |
| <b>Any loss of consciousness, n (%)</b>       |                   |                   |                   | 0.364        |
| No                                            | 0 (0.0)           | 1 (4.3)           | 0 (0.0)           |              |
| Yes                                           | 39 (92.9)         | 21 (91.3)         | 8 (88.9)          |              |
| Suspected                                     | 3 (7.1)           | 1 (4.3)           | 1 (11.1)          |              |

EVD: external ventricular drain; IPM: intraparenchymal monitor; ICP: intracranial pressure; BMI: body mass index; SD: standard deviation; GCS: Glasgow coma score; IQR: interquartile range; ED: emergency department; CT: computed tomography.

## Feature selection and classification

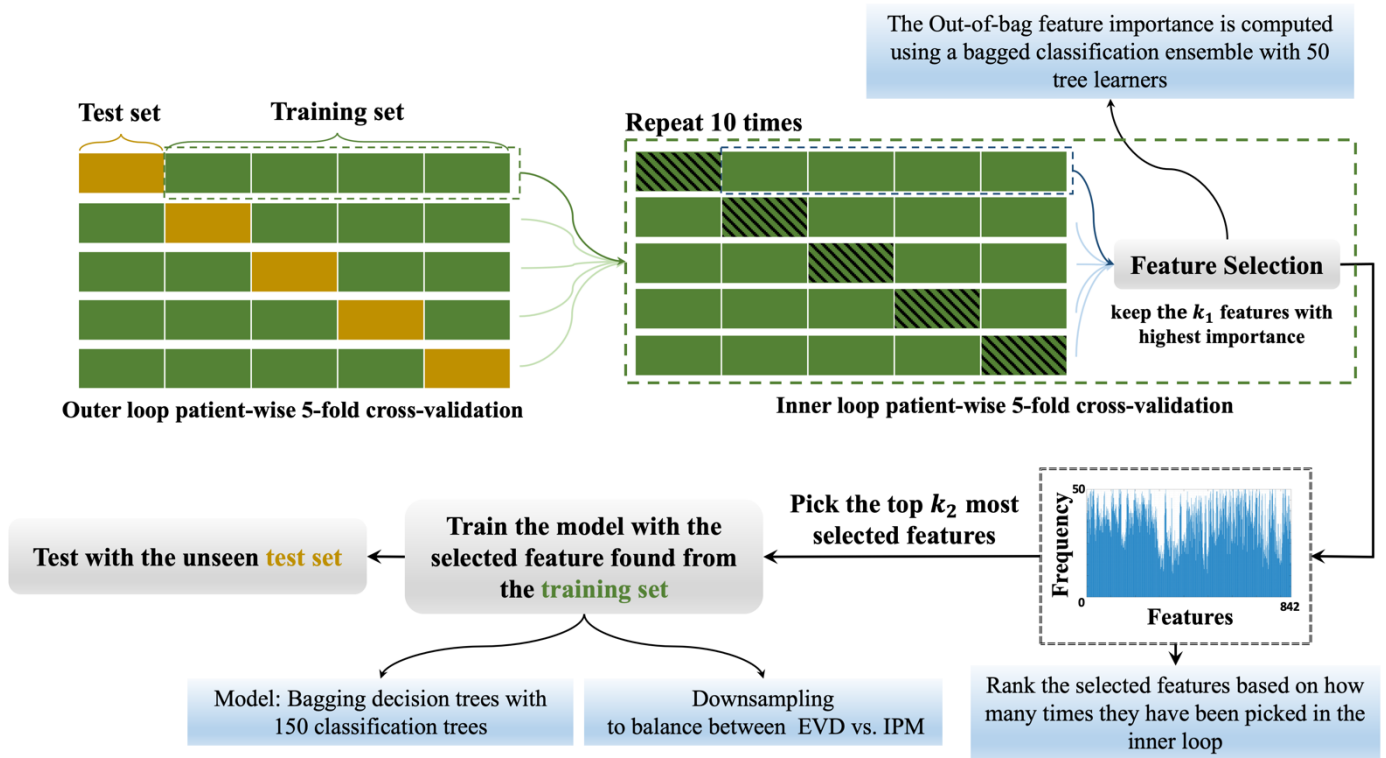

**Figure S1:** Schematic of model development. The outer loop partitioned the data into five folds, with four of these folds comprising 80% of the data being utilized for feature selection and model training, while the remaining 20% was utilized for evaluating the model performance. This process was repeated until each fold had served as the test set. The inner loop applied another five-fold cross-validation procedure to the training set to select the most significant features. In each fold of the inner loop, the top 600 features (referred to as  $k_1$ ) were selected based on the out-of-bag feature importance. The inner five-fold cross-validation loop was repeated 10 times, resulting in 50 sets of  $k_1$  features. These  $k_1$  features were then ranked by selection frequency, and based on a 75<sup>th</sup> percentile threshold, referred to as  $k_2$ , chosen as the final selected feature set. For each outer loop iteration, our model was trained to differentiate waveform data from an EVD from an IPM, using the features selected in the inner loop by utilizing 150 bootstrap-aggregated decision trees. Subsequently, the model was evaluated on the hold-out test set. To conduct a comparative analysis, we also employed linear discriminant analysis (LDA) for classification in the outer loop.

## Subgroup analysis

**Table S2.** List of potential confounders and their dichotomization.

| <b>Potential Confounder</b>               | <b>Dichotomized</b>                                                                                                  |
|-------------------------------------------|----------------------------------------------------------------------------------------------------------------------|
| Age                                       | 2 categories; $\leq 45$ years and $> 45$ years                                                                       |
| Sex                                       | 2 categories; male and female                                                                                        |
| Race                                      | 7 categories; White, Black, Asian, native Hawaiian/Pacific Islander, Mixed Race, Indian, Alaska Native/Inuit         |
| Ethnicity                                 | 2 categories; Hispanic and non-Hispanic                                                                              |
| BMI                                       | 4 categories; underweight ( $< 18.5$ ), normal ( $18.5-24.9$ ), overweight ( $24.9-29.9$ ), obese ( $> 29.9$ )       |
| Acceleration-deceleration injury          | 2 categories; yes & no                                                                                               |
| Loss of consciousness                     | 3 categories; yes, no & suspected                                                                                    |
| Admitting hospital                        | 5 categories; A, B, C, D & E                                                                                         |
| Presence of subdural hemorrhage on CT     | 2 categories; yes & no                                                                                               |
| Presence of subarachnoid hemorrhage on CT | 2 categories; yes & no                                                                                               |
| Presence of midline shift                 | 2 categories; yes & no                                                                                               |
| Amount of midline shift                   | 3 categories; 0, 1-8, $> 8$                                                                                          |
| Marshall CT score                         | 6 categories; category I through category VI                                                                         |
| Hypoxia upon admission                    | 2 categories; yes & no                                                                                               |
| Hypotension upon admission                | 2 categories; yes & no                                                                                               |
| Left pupil reactivity upon admission      | 3 categories; brisk, sluggish & non-reactive                                                                         |
| Right pupil reactivity upon admission     | 3 categories; brisk, sluggish & non-reactive                                                                         |
| GCS total score upon admission            | 3 categories; severe (3-8), moderate (9-12), mild (13-15)                                                            |
| GCS motor score upon admission            | 6 categories; 1 through 6                                                                                            |
| GCS verbal score upon admission           | 5 categories; 1 through 5                                                                                            |
| GCS eye score upon admission              | 4 categories; 1 through 4                                                                                            |
| Computer type                             | 2 categories; Philips Intellivue & Natus Camino                                                                      |
| ICP signal duration                       | 4 categories (quartiles); Q1 (0 - 105.07h), Q1-Q2 (105.07h-184.53h), Q2-Q3 (184.53h - 405.7h), $> Q3$ ( $> 405.7h$ ) |

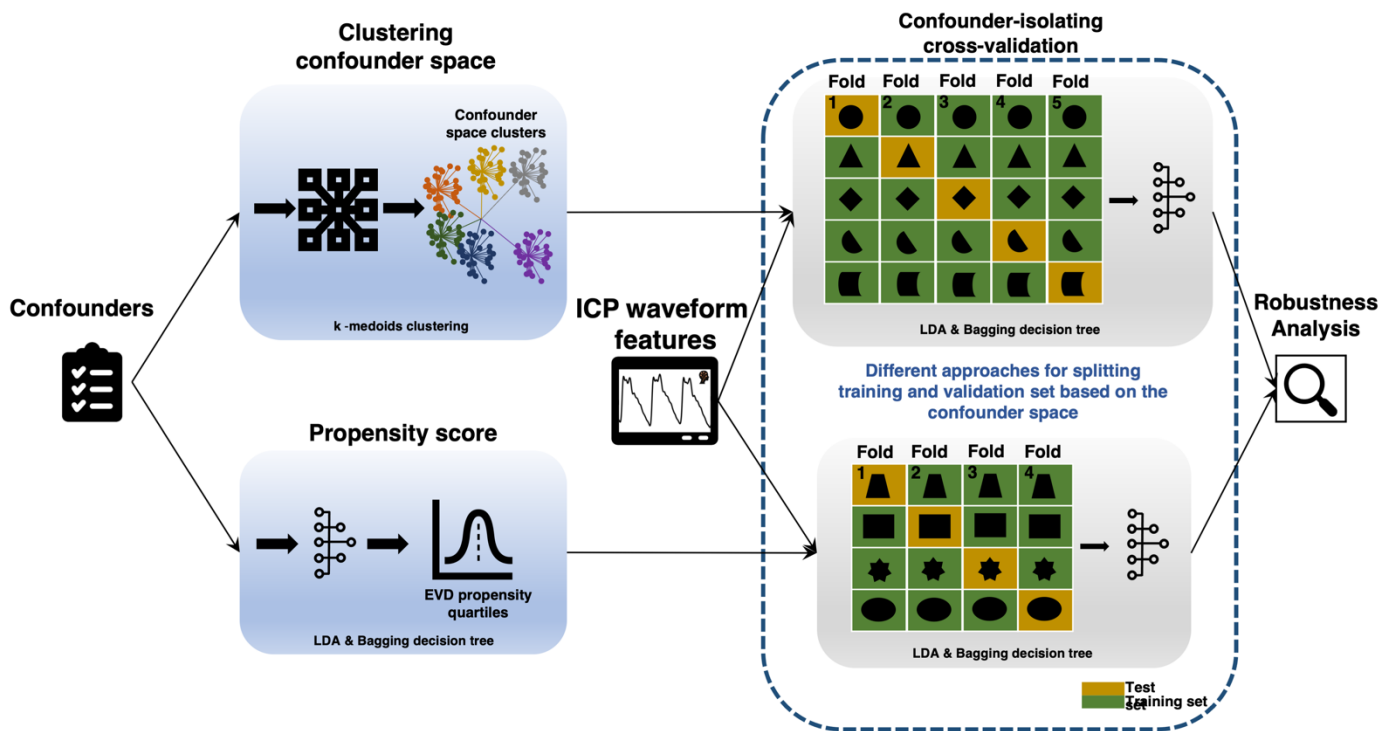

**Figure S2:** Procedures to ensure rigor and robustness included cluster- and propensity score-based confounder-isolating cross-validation schemes. The cluster-based approach (top) employed the *k*-medoids clustering algorithm and iteratively partitioned the data into three, five, and eight clusters with unique clinical phenotypes. Testing on a clinically distinct cluster from the cluster utilized for training enabled us to assess the model's performance or features when accounting for confounding variables. In the propensity score-based approach (bottom), the data was stratified based on the likelihood, or propensity, of an ICP waveform belonging to the EVD class given the patient's clinical characteristics. The data was partitioned by the highest to lowest quartile of propensity for one monitor type, forming four distinct subgroups employed within the confound-isolating cross-validation process.

## **Management of artifacts**

The primary focus of this study was to analyze the impact of the ICP monitor on the ICP waveforms rather than the artifacts it produces. However, removing these artifacts from our analysis could potentially affect our ability to accurately classify the type of ICP monitor being used (e.g., EVD or IPMs). This is because these artifacts may contain useful information that has not yet been captured by the 842 features that have been extracted so far. To test this hypothesis, we have extracted 11 features based solely on artifacts. These features were extracted from segments of signals detected as artifacts, hereafter referred to as "*artifactual segments*," based on our developed artifact detection algorithm (as described in the manuscript). The features include the numbers, maximum, and minimum values of artifactual segments, as well as the 25<sup>th</sup>, 50<sup>th</sup>, 75<sup>th</sup>, and 97<sup>th</sup> percentiles of Shannon entropy values and the lengths of artifactual segments.

We utilized a combination of artifact-based data and our extensive list of 842 features in our discussed feature selection and classification approach. This aimed to evaluate the contribution of artifact segments in distinguishing between EVD and IPM.



## Results

Conventional cross-validation

**Table S3.** Patient-wise 5-fold cross-validation results over the unseen test data using bagged decision trees.

| Performance Metric <sup>a</sup> | Fold  |       |       |       |       | Mean±SD     |
|---------------------------------|-------|-------|-------|-------|-------|-------------|
|                                 | 1     | 2     | 3     | 4     | 5     |             |
| Sensitivity                     | 0.902 | 0.916 | 0.995 | 0.922 | 0.985 | 0.944±0.038 |
| Specificity                     | 0.955 | 0.925 | 0.706 | 0.950 | 0.810 | 0.869±0.097 |
| Precision                       | 0.979 | 0.937 | 0.757 | 0.986 | 0.882 | 0.908±0.084 |
| False positive rate             | 0.045 | 0.075 | 0.294 | 0.050 | 0.190 | 0.131±0.097 |
| Accuracy                        | 0.918 | 0.92  | 0.845 | 0.928 | 0.913 | 0.905±0.030 |
| F1                              | 0.939 | 0.926 | 0.860 | 0.953 | 0.930 | 0.922±0.032 |
| AU-ROC                          | 0.935 | 0.981 | 0.866 | 0.974 | 0.907 | 0.932±0.043 |

<sup>a</sup> Positive class, extraventricular drain (ventriculostomy); negative class, intraparenchymal monitor

**Table S4.** Patient-wise 5-fold cross-validation results over the unseen test data using linear discriminant analysis.

| Performance Metric <sup>a</sup> | Fold  |       |       |       |       | Mean±SD     |
|---------------------------------|-------|-------|-------|-------|-------|-------------|
|                                 | 1     | 2     | 3     | 4     | 5     |             |
| Sensitivity                     | 0.852 | 0.871 | 0.933 | 0.810 | 0.949 | 0.883±0.051 |
| Specificity                     | 0.891 | 0.803 | 0.704 | 0.857 | 0.832 | 0.817±0.064 |
| Precision                       | 0.948 | 0.842 | 0.744 | 0.957 | 0.890 | 0.876±0.078 |
| False positive rate             | 0.109 | 0.197 | 0.296 | 0.143 | 0.168 | 0.183±0.064 |
| Accuracy                        | 0.864 | 0.840 | 0.814 | 0.820 | 0.901 | 0.848±0.032 |
| F1                              | 0.898 | 0.856 | 0.828 | 0.877 | 0.919 | 0.876±0.032 |
| AU-ROC                          | 0.920 | 0.894 | 0.874 | 0.912 | 0.897 | 0.900±0.016 |

<sup>a</sup> Positive class, extraventricular drain (ventriculostomy); negative class, intraparenchymal monitor

**Table S5.** Average confusion matrices of 5-fold cross-validation over the unseen test data (n, epoch number) for the two methods

| Actual Class                        | Predicted Class |     |
|-------------------------------------|-----------------|-----|
|                                     | EVD             | IPM |
| <i>Bagged Decision Trees</i>        |                 |     |
| EVD                                 | 309             | 18  |
| IPM                                 | 37              | 168 |
| <i>Linear Discriminant Analysis</i> |                 |     |
| EVD                                 | 286             | 40  |
| IPM                                 | 45              | 160 |

*EVD, extraventricular drain (ventriculostomy); IPM, intraparenchymal monitor*

## Misclassification samples

**Figure S3:** Examples of noisy ICP signals that were misclassified.

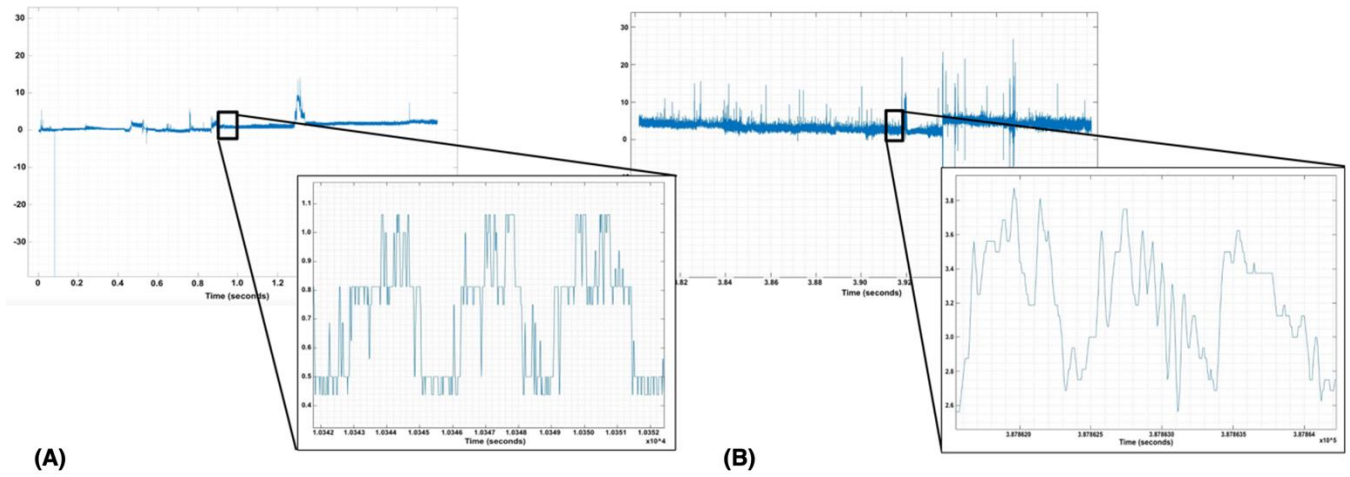

(A) ICP signal from IPM detected as EVD. (B) ICP signal from EVD detected as IPM. As can be seen from the figure, the ICP signals were highly noisy and, thus, morphologically did not look like an ICP signal, causing them to be misclassified.

## Subgroup analysis (cluster analysis)

**Table S6.** Cluster-based confounder-isolating patient-wise cross-validation results over the unseen test data using bagged decision trees. FPR and SD indicate the false positive rate and standard deviation, respectively. (Positive class: EVD, Negative class: IPM)

| Performance Metric <sup>a</sup>       | 3-cluster     | 5-cluster     | 8-cluster     |
|---------------------------------------|---------------|---------------|---------------|
| <b>Sensitivity, mean (SD)</b>         | 0.947 (0.017) | 0.948 (0.038) | 0.963 (0.033) |
| <b>Specificity, mean (SD)</b>         | 0.724 (0.084) | 0.813 (0.160) | 0.844 (0.146) |
| <b>Precision, mean (SD)</b>           | 0.804 (0.119) | 0.874 (0.135) | 0.891 (0.114) |
| <b>False positive rate, mean (SD)</b> | 0.276 (0.084) | 0.187 (0.160) | 0.157 (0.146) |
| <b>Accuracy, mean (SD)</b>            | 0.852 (0.037) | 0.890 (0.066) | 0.918 (0.069) |
| <b>F1 score, mean (SD)</b>            | 0.864 (0.071) | 0.902 (0.074) | 0.922 (0.072) |
| <b>AUROC, mean (SD)</b>               | 0.852 (0.094) | 0.901 (0.090) | 0.929 (0.092) |

<sup>a</sup> Positive class, extraventricular drain (ventriculostomy); negative class, intraparenchymal monitor

**Table S7.** Cluster-based confounder-isolating patient-wise cross-validation results over the unseen test data using linear discriminant analysis.

| Performance Metric <sup>a</sup>       | 3-cluster     | 5-cluster     | 8-cluster     |
|---------------------------------------|---------------|---------------|---------------|
| <b>Sensitivity, mean (SD)</b>         | 0.834 (0.079) | 0.890 (0.056) | 0.917 (0.039) |
| <b>Specificity, mean (SD)</b>         | 0.692 (0.047) | 0.772 (0.100) | 0.813 (0.128) |
| <b>Precision, mean (SD)</b>           | 0.768 (0.119) | 0.834 (0.098) | 0.846 (0.106) |
| <b>False positive rate, mean (SD)</b> | 0.308 (0.047) | 0.228 (0.100) | 0.187 (0.128) |
| <b>Accuracy, mean (SD)</b>            | 0.786 (0.045) | 0.844 (0.050) | 0.871 (0.043) |
| <b>F1 score, mean (SD)</b>            | 0.796 (0.091) | 0.858 (0.066) | 0.874 (0.048) |
| <b>AUROC, mean (SD)</b>               | 0.811 (0.024) | 0.888 (0.049) | 0.919 (0.058) |

<sup>a</sup> Positive class, extraventricular drain (ventriculostomy); negative class, intraparenchymal monitor

## Subgroup Analysis by Propensity Score

**Table S8.** Propensity-based 4-fold patient-wise cross-validation results over the unseen test data using bagged decision trees.

| Performance Metric <sup>a</sup> | Fold (Propensity Score) |                    |                    |                | Mean±SD     |
|---------------------------------|-------------------------|--------------------|--------------------|----------------|-------------|
|                                 | 1<br>(0-0.478)          | 2<br>(0.478-0.691) | 3<br>(0.691-0.835) | 4<br>(0.835-1) |             |
| <b>Sensitivity</b>              | 1                       | 0.877              | 0.953              | 0.986          | 0.954±0.048 |
| Specificity                     | 0.868                   | 0.939              | 0.558              | 0.788          | 0.788±0.143 |
| Precision                       | 0.566                   | 0.986              | 0.813              | 0.928          | 0.823±0.161 |
| False positive rate             | 0.132                   | 0.061              | 0.442              | 0.212          | 0.212±0.143 |
| Accuracy                        | 0.887                   | 0.887              | 0.822              | 0.934          | 0.883±0.040 |
| F1                              | 0.723                   | 0.928              | 0.877              | 0.956          | 0.871±0.090 |
| AU-ROC                          | 1                       | 0.951              | 0.698              | 0.966          | 0.904±0.120 |

<sup>a</sup> Positive class, extraventricular drain (ventriculostomy); negative class, intraparenchymal monitor

**Table S9.** Propensity-based 4-fold patient-wise cross-validation results over the unseen test data using linear discriminant analysis.

| Performance Metric <sup>a</sup> | Fold (Propensity Score) |                    |                    |                | Mean±SD     |
|---------------------------------|-------------------------|--------------------|--------------------|----------------|-------------|
|                                 | 1<br>(0-0.228)          | 2<br>(0.228-0.582) | 3<br>(0.582-0.927) | 4<br>(0.927-1) |             |
| <b>Sensitivity</b>              | 0.96                    | 0.872              | 0.886              | 0.942          | 0.915±0.037 |
| Specificity                     | 0.769                   | 0.877              | 0.625              | 0.771          | 0.761±0.090 |
| Precision                       | 0.744                   | 0.942              | 0.881              | 0.903          | 0.867±0.075 |
| False positive rate             | 0.231                   | 0.123              | 0.375              | 0.229          | 0.239±0.090 |
| Accuracy                        | 0.848                   | 0.873              | 0.823              | 0.890          | 0.859±0.025 |
| F1                              | 0.838                   | 0.906              | 0.884              | 0.922          | 0.887±0.032 |
| AU-ROC                          | 0.897                   | 0.933              | 0.827              | 0.934          | 0.898±0.043 |

<sup>a</sup> Positive class, extraventricular drain (ventriculostomy); negative class, intraparenchymal monitor

## Subgroup Analysis by Potential Confounders

Utilizing a bagged decision tree (**Table S10**) improves the sensitivity, specificity, F1-score, and AU-ROC by an average of 0.004, 0.001, 0.003, and 0.004, respectively, in a 5-fold cross-validation. On the other hand (**Table S11**), when using LDA, these values decrease by an average of 0.014, 0.005, and 0.009 for sensitivity, specificity, and F1-score, respectively, with no change in AU-ROC. This discrepancy may be due to the different classifiers' ability to handle features. We conclude that the list of 842 features already encompasses information captured by artifactual segments. Further research could explore non-ICP features to automatically generate metadata in a more efficient manner.

**Table S10.** Patient-wise 5-fold cross-validation results over the unseen test data using bagged decision trees (artifact-based features + 842 features).

| Performance Metric <sup>a</sup> | Fold  |       |       |       |       | Mean±SD     |
|---------------------------------|-------|-------|-------|-------|-------|-------------|
|                                 | 1     | 2     | 3     | 4     | 5     |             |
| Sensitivity                     | 0.896 | 0.938 | 0.991 | 0.933 | 0.980 | 0.948±0.034 |
| Specificity                     | 0.962 | 0.925 | 0.713 | 0.933 | 0.818 | 0.870±0.093 |
| Precision                       | 0.982 | 0.938 | 0.761 | 0.982 | 0.885 | 0.910±0.083 |
| False positive rate             | 0.038 | 0.075 | 0.287 | 0.067 | 0.182 | 0.130±0.093 |
| Accuracy                        | 0.916 | 0.932 | 0.846 | 0.933 | 0.913 | 0.908±0.032 |
| F1                              | 0.937 | 0.938 | 0.861 | 0.957 | 0.930 | 0.925±0.033 |
| AU-ROC                          | 0.937 | 0.987 | 0.863 | 0.970 | 0.926 | 0.936±0.043 |

<sup>a</sup> Positive class, extraventricular drain (ventriculostomy); negative class, intraparenchymal monitor

**Table S11.** Patient-wise 5-fold cross-validation results over the unseen test data using LDA (artifact-based features + 842 features).

| Performance Metric <sup>a</sup> | Fold  |       |       |       |       | Mean±SD     |
|---------------------------------|-------|-------|-------|-------|-------|-------------|
|                                 | 1     | 2     | 3     | 4     | 5     |             |
| Sensitivity                     | 0.877 | 0.843 | 0.947 | 0.774 | 0.904 | 0.869±0.058 |
| Specificity                     | 0.846 | 0.789 | 0.736 | 0.874 | 0.818 | 0.813±0.048 |
| Precision                       | 0.930 | 0.829 | 0.768 | 0.960 | 0.877 | 0.873±0.069 |
| False positive rate             | 0.154 | 0.211 | 0.264 | 0.126 | 0.182 | 0.188±0.048 |
| Accuracy                        | 0.868 | 0.818 | 0.837 | 0.794 | 0.868 | 0.837±0.029 |
| F1                              | 0.903 | 0.836 | 0.848 | 0.857 | 0.890 | 0.866±0.026 |
| AU-ROC                          | 0.924 | 0.889 | 0.898 | 0.911 | 0.892 | 0.903±0.013 |

<sup>a</sup> Positive class, extraventricular drain (ventriculostomy); negative class, intraparenchymal monitor

## Feature selection

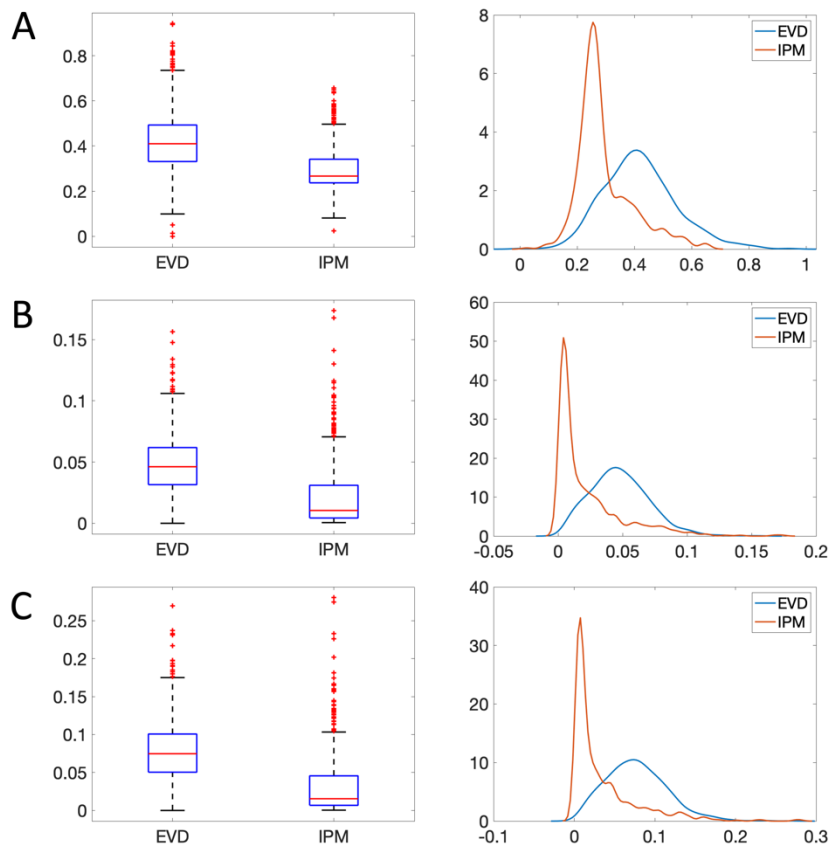

**Figure S4:** Example box plots and kernel density plots for a sample of the 62 selected features. A) Mean eigenvalues in phase space between rolling windows. B) Standard deviation of coefficients of an autoregressive model between rolling windows. C) Standard deviation of the distance between phase space nullclines (or clusters) between rolling windows.

## Held-out evaluation

We kept the subgroup with both monitoring types of unseen and utilized them for evaluation. This means that we train the model using the rest of the patients and test it on the subgroup with both (9 patients). The results of bagged decision tree (BDT) and linear discriminant analysis (LDA) classifiers are as follows:

**Table S12.** Performance of Bagged Decision Tree (BDT) and Linear Discriminant Analysis (LDA) classifiers on held-out subgroup with both monitoring types.

|     | Sensitivity | Specificity | Precision | FPR   | Accuracy | F1    | AU-ROC |
|-----|-------------|-------------|-----------|-------|----------|-------|--------|
| BDT | 0.848       | 0.747       | 0.766     | 0.253 | 0.797    | 0.805 | 0.826  |
| LDA | 0.823       | 0.626       | 0.683     | 0.373 | 0.724    | 0.747 | 0.762  |

As evident from the results of the 9 unseen patients, the achieved sensitivity and specificity are promising. However, the performance is diminished compared to the cross-validation results. Additional validation data from multiple centres are necessary for a fair evaluation.

**IRB site info**

Baylor, Protocol Number: H-31230, 6/15/2012. Institutional Review Board for Baylor College of Medicine and Affiliated Hospitals. TRANSFORMING RESEARCH AND CLINICAL KNOWLEDGE IN TRAUMATIC BRAIN INJURY II (TRACK-TBI II).

Utah, IRB # 00100289, 11/16/2017. Institutional Review Board the University of Utah. - Transforming Research and Clinical Knowledge in Traumatic Brain Injury (TRACK-TBI).

UCSF, IRB # 12-09465, 12/23/2013. UCSF Human research protection program committee on human research. Transforming Research and Clinical Knowledge in Traumatic Brain Injury U01.

University of Cincinnati, Study ID 2013-8278, 4/22/2014, Institutional Review Board- Federalwide Assurance #00003152 University of Cincinnati. Transforming Research and Clinical Knowledge in Traumatic Brain Injury: TRACK-TBI Clinical Protocol.

University of Pittsburgh medical center, PRO08080168, 2/14/2014, University of Pittsburgh Institutional Review Board. Transforming Traumatic Brain Injury Research and Clinical Care.
